# A rationalized definition of tumor suppressor microRNAs excludes miR-34a

Sophie Mockly<sup>1</sup>, Élisabeth Houbbron<sup>1</sup> and Hervé Seitz<sup>1,2</sup>

1. Institut de Génétique Humaine, UMR 9002 CNRS and university of Montpellier, Montpellier, France
2. Corresponding author; telephone: (+33)434359936; fax: (+33)434359901; email: [herve.seitz@igh.cnrs.fr](mailto:herve.seitz@igh.cnrs.fr)

**Character count for main text (including spaces):** 16,505

**Running title:** miR-34a is not a tumor suppressor

## 1 Abstract

2 While several microRNAs (miRNAs) have been proposed to act as tumor suppressors, a consensual  
3 definition of tumor suppressing miRNAs is still missing. Similarly to coding genes, we propose that  
4 tumor suppressor miRNAs must show evidence of genetic or epigenetic inactivation in cancers, and  
5 exhibit an anti-proliferative activity under endogenous expression levels. Here we observe that this  
6 definition excludes the most extensively studied tumor suppressor candidate miRNA, miR-34a. In  
7 analyzable cancer types, miR-34a does not appear to be down-regulated in primary tumors relatively  
8 to normal adjacent tissues. Deletion of *miR-34a* is occasionally found in human cancers, but it  
9 does not seem to be driven by an anti-tumorigenic activity of the miRNA, since it is not observed  
10 upon smaller, *miR-34a*-specific alterations. Its anti-proliferative action was observed upon large,  
11 supra-physiological transfection of synthetic miR-34a in cultured cells, and our data indicates that  
12 endogenous miR-34a levels do not have such an effect. Our results therefore argue against a tumor  
13 suppressive function for miR-34a, providing an explanation to the lack of efficiency of synthetic  
14 miR-34a administration against solid tumors.

15 **Keywords:** microRNA / miR-34 / proliferation / tumor suppressor

## 16 Introduction

17 Tumor suppressors are genes whose activity antagonizes tumorigenesis. Consequently, they are fre-  
18 quently silenced, either by germline-inherited or somatic mutation, or otherwise inactivated, in can-  
19 cers [Green, 1988]. Mechanistically, tumor suppressors mediate cellular environment-induced inhibi-  
20 tion of cell proliferation, therefore exhibiting anti-proliferative activity under their natural expression  
21 levels: a gene displaying cytotoxic or cytostatic activity only when inappropriately overexpressed is  
22 therefore excluded from that definition [Weinberg, 1991].

23 miRNAs are small regulatory RNAs, guiding their effector proteins to specific target RNAs,  
24 which are repressed by various mechanisms (target RNA degradation and translational inhibition)  
25 [Iwakawa and Tomari, 2015]. Targets are recognized by sequence complementarity, with most targets  
26 bearing a perfect match to the miRNA “seed” (nt 2–7) [Bartel, 2009]. Such a short binding motif  
27 makes miRNA/target binding poorly specific, and more than 60% of human genes are predicted to  
28 be targeted by at least one miRNA [Friedman et al., 2009]. Because such gene regulators can act  
29 in signal transduction cascades, they may participate in tumor-suppressive pathways. A consensual  
30 definition for “tumor suppressor miRNAs” is still lacking, with some tentative definitions being  
31 based on miRNA down-regulation in cancer cells [Zhang et al., 2007], on the targets’ annotation  
32 [Wong et al., 2011], or both [Adams et al., 2016]. We rather propose to follow the initial definition  
33 of tumor suppressors [Weinberg, 1991], considering that there is no reason to particularize miRNAs  
34 among other types of tumor suppressors. We thus advocate for the following definition of tumor  
35 suppressor miRNAs: **(i)** there is evidence for their frequent inactivation in cancer (either by genetic or  
36 epigenetic alteration; potentially only in specific cancer types); and **(ii)** they repress cell proliferation  
37 under their endogenous expression level, rather than upon unrealistic overexpression.

38 We applied this definition to interrogate the status of the most highly-studied tumor suppres-  
39 sor candidate miRNA, miR-34a. It is a member of the miR-34 family, comprising six members in  
40 human and in mouse: miR-34a, miR-34b, miR-34c, miR-449a, miR-449b and miR-449c (Supple-  
41 mentary Figure S1). The three miR-34a/b/c subfamily members are transcriptionally controlled  
42 by the p53 tumor suppressor, which suggested that these miRNAs could participate in the tumor  
43 suppressive activity of the p53 network [He et al., 2007, Bommer et al., 2007, Chang et al., 2007,  
44 Corney et al., 2007, Tarasov et al., 2007, Tazawa et al., 2007, Raver-Shapira et al., 2007]. Indeed,  
45 the miR-34a member is down-regulated or lost in various cancer models (tumor samples or trans-  
46 formed cell lines) relatively to normal samples [He et al., 2007, Chang et al., 2007, Welch et al., 2007,  
47 Bommer et al., 2007, Tazawa et al., 2007, Lodygin et al., 2008, Gallardo et al., 2009, Wiggins et al., 2010,  
48 Corney et al., 2010]. Yet *miR-34a*<sup>-/-</sup>, *miR-34b*<sup>-/-</sup>, *miR-34c*<sup>-/-</sup> triple knock-out mice do not exhibit  
49 obvious defects in p53-dependent proliferation control or in tumor suppression [Concepcion et al., 2012].  
50 And, while pre-clinical studies in mice gave encouraging results (reviewed in [Bader, 2012, Hong et al., 2020]),  
51 administration of a synthetic miR-34a to human patients with solid tumors failed to repress tumor  
52 growth reproducibly [Beg et al., 2017]. An alternate administration regimen (allowing increased drug  
53 exposure) did not clearly improve clinical outcomes, while triggering poorly-understood, severe ad-  
54 verse effects [Hong et al., 2020].

## 55 Results and Discussion

56 It is now possible to compare miRNA levels between tumors and normal adjacent tissues on a large  
57 collection of human cases [Zhang et al., 2021], allowing a rigorous assessment of miR-34a expression  
58 in tumorigenesis. Selecting every cancer type where miRNA expression is available for primary  
59 tumor and normal adjacent tissue, in at least 10 studied cases (n=20 cancer types), we did not find  
60 any cancer type where miR-34a was significantly down-regulated (Fig 1A). Hence in this collection of  
61 cancer types, human primary tumors do not tend to under-express miR-34a, contradicting the notion  
62 that genetic or epigenetic silencing of *miR-34a* could participate in tumorigenesis.

63 Accordingly, genetic alterations affecting *miR-34a* are very rare in cancer: focusing on every  
64 cancer type for which gene-level copy number was measured in at least 100 cases (n=29 cancer  
65 types), we did not observe any tendency for the loss of *miR-34a* relatively to other miRNA genes

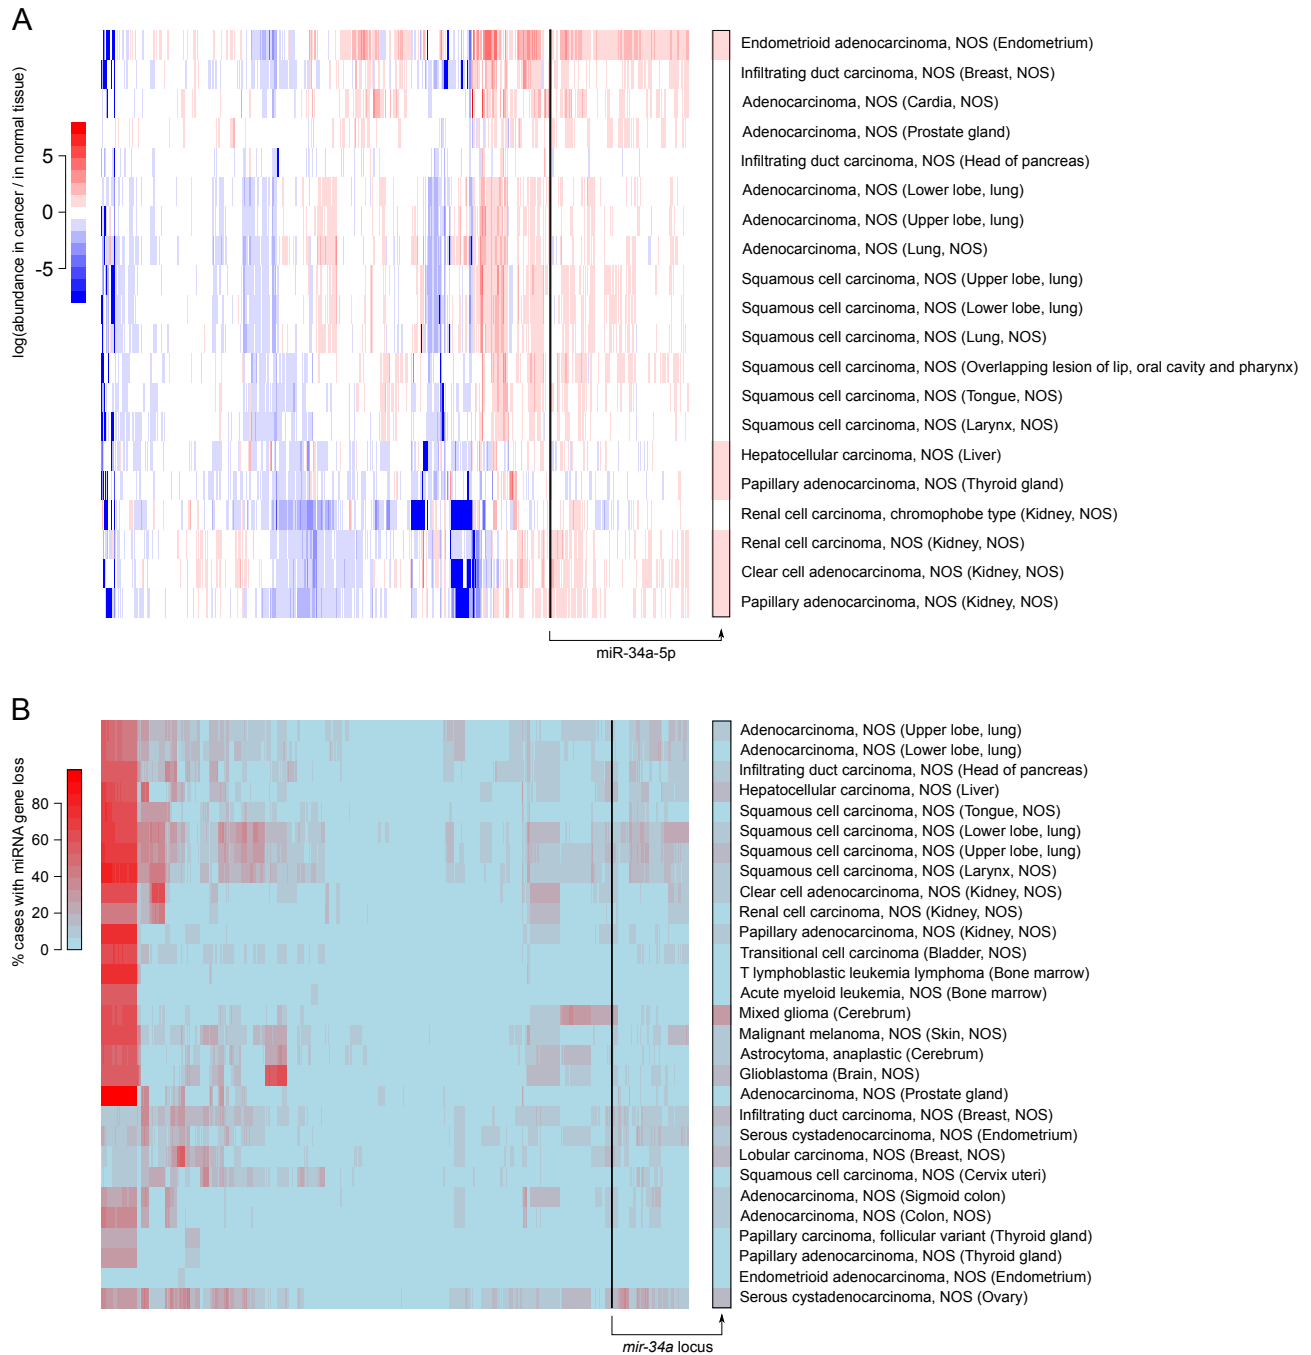

Figure 1: *mir-34a* is not generally down-regulated or lost in cancers. (A) miRNA abundance (normalized by the number of mapped miRNA reads) was compared between primary tumors and normal adjacent tissues. Only cancer types for which at least 10 cases were analyzed have been considered (n=20 cancer types; rows), and miRNAs with a null variance across cancer types were excluded (remaining: n=545 miRNAs; columns). For each miRNA/cancer type pair, the heatmap shows its median fold-change across all cases, with non-significant changes ( $FDR \geq 0.05$ ) being shown in white.  $\log(\text{fold-changes})$  larger than +8 or smaller than -8 were set to +8 or -8 respectively, for graphical clarity. (B) Only cancer types for which at least 100 cases were analyzed have been considered (n=29 cancer types; rows), and miRNA genes whose ploidy could not be assessed were excluded (remaining: n=1,686 miRNAs; columns). For each miRNA/cancer type pair, the heatmap shows the percentage of cases with monoallelic or biallelic loss of the miRNA gene. Both panels: the column showing miR-34a data is magnified on the right margin (framed in black). “NOS”: not otherwise specified.

66 (see Fig 1B). Similarly, we did not find any evidence for the selective mutation of the pre-miR-34a  
67 hairpin precursor sequence, mature miR-34a or the miR-34a seed in cancers (n=30 analyzed cancer  
68 types; Supplementary Figure S2). In contrast to *miR-34a*, 105 miRNA loci tend to be frequently lost  
69 in 19 cancer types (red area at the top left corner of the heatmap in Fig 1B; listed in Supplementary  
70 Table S1): these miRNAs are more convincing tumor suppressor candidates than *miR-34a* in this  
71 respect.

72 Hence the loss or mutation of *miR-34a* does not appear to be enriched in cancer. We note that  
73 *miR-34a* is located on cytogenetic band 1p36, which is often altered in a wide variety of cancers.  
74 But our analyses suggest that the inactivation of *miR-34a* is not the actual driver for deletion se-  
75 lection – and because a convincing tumor suppressor is already known at 1p36 (the *CHD5* gene  
76 [Bagchi et al., 2007]), we propose that the occasional deletion of *miR-34a* in cancer is rather a conse-  
77 quence of its genomic proximity with such a real tumor suppressor. Accordingly, whenever a limited  
78 region of consistent deletion could be mapped in 1p36, that region excludes *miR-34a* (with the only  
79 exception of myelodysplastic syndromes, but with low experimental support): see Supplementary  
80 Figure S3.

81 miR-34a has also been considered a tumor suppressor candidate on the basis of the apparent  
82 anti-proliferative activity of miR-34 family miRNAs. Numerous studies in cultured cell lines in-  
83 deed showed that miR-34 transfection inhibits cell proliferation [Welch et al., 2007, He et al., 2007,  
84 Chang et al., 2007, Corney et al., 2007, Tarasov et al., 2007, Tazawa et al., 2007, Raver-Shapira et al., 2007].  
85 But miRNA over-expression generates false positives, raising the possibility that this reported anti-  
86 proliferative role is artifactual [Mockly and Seitz, 2019]. We thus deleted the *miR-34a* gene in  
87 HCT-116 cells, where it has been proposed to be anti-proliferative by several independent stud-  
88 ies [He et al., 2007, Chang et al., 2007, Tazawa et al., 2007] (mutagenesis strategy in Supplementary  
89 Figure S4). Deletion of the *miR-34a* locus eliminated 94% of the expression of the whole miR-34  
90 family (Fig 2A and B). Our results do not show any significant difference in the growth rate of *miR-*  
91 *34a*<sup>-/-</sup> and wild-type clones (Fig 2C). We also prepared *miR-34a*<sup>-</sup> clones from the human haploid  
92 HAP1 cell line, where miR-34a is also not anti-proliferative (it is even slightly pro-proliferative;  
93 Supplementary Figure S5). It could be argued that *miR-34a* does not inhibit cell proliferation in  
94 unstressed conditions, while being anti-proliferative upon genotoxic stress. But we also failed to ob-  
95 serve significant differences between wild-type and mutant clones under doxorubicin or 5-fluoro-uracil  
96 treatment (Fig 2D and E).

97 In agreement with published data, we did observe a strong reduction in cell proliferation when  
98 we transfected HCT-116 cells with large amounts (10 nM) synthetic miR-34a duplex (Fig 3A), but  
99 that effect was lost when transfecting 1 nM duplex (Fig 3B). Absolute miRNA quantification by RT-  
100 ddPCR shows that a 10 nM transfection over-expresses miR-34a by >8,000-fold in HCT-116 cells (and  
101 a 1 nM transfection over-expresses it by >490-fold), clearly demonstrating that such an experiment  
102 results in supra-physiological miRNA concentrations (Fig 3C). For comparison, we measured the  
103 increase in miR-34a expression in response to DNA damage: a 72 h treatment with doxorubicin at its  
104 IC50 concentration ( $7 \times 10^{-8}$  M in HCT-116 cells; Supplementary Figure S6) over-expresses miR-34a  
105 by only 4.7-fold (Fig 3D).

106 Of note, some authors have previously characterized the proliferative effect of miR-34 using genetic  
107 ablation rather than over-expression. In one study, mouse embryonic fibroblasts (MEFs) devoid  
108 of miR-34a/b/c appear to grow at the same rate than wild-type MEFs, except, transiently, for  
109 one early time-point [Concepcion et al., 2012]. In another study, genetic inactivation of the *miR-*  
110 *34a* gene in HCT-116 is reported to accelerate cell proliferation, in stark contrast with our own  
111 findings [Navarro and Lieberman, 2015]. Such discrepancy would deserve to be investigated, but  
112 unfortunately that published mutant cell line has been lost and it is no longer available from the  
113 authors (Dr. J. Lieberman, personal communication).

114 While the miR-34 family is believed to exert a tumor suppressive action in a diversity of cancers  
115 [Slack and Chinnaiyan, 2019], we observed that it is hardly expressed in cultured cell lines, primary  
116 tissues and body fluids (Supplementary Figure S7–S9). Current RNA detection technologies can be  
117 extremely sensitive, and they can detect miRNAs which are too poorly abundant to induce any clear

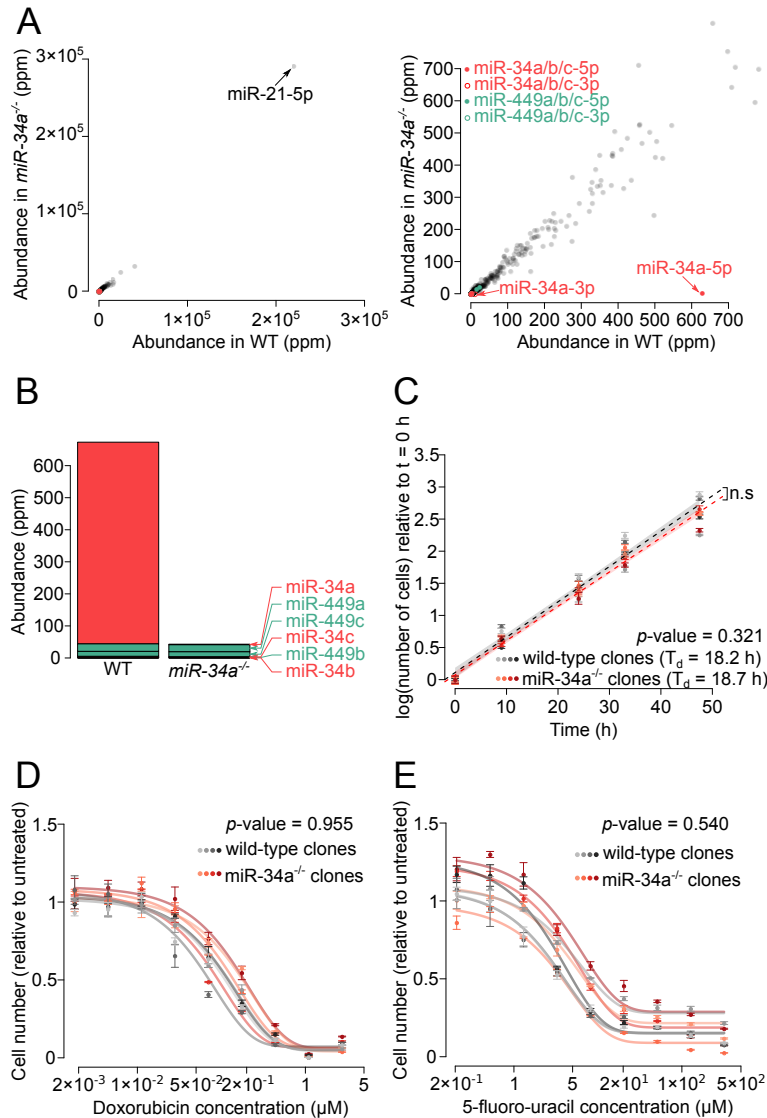

Figure 2: miR-34 is not a general repressor of cell proliferation. (A) miRNA quantification by Small RNA-Seq in a representative wild-type HCT-116 clone ( $x$  axis) and a representative  $miR-34a^{-/-}$  clone ( $y$  axis). Right panel: magnification of the left panel. (B) Cumulated abundance of miR-34 family members in the two clones. miRNAs are sorted vertically according to their abundance in the wild-type clone. (C) Four wild-type and four  $miR-34a$  mutant clones were grown in sub-confluent conditions. Means and standard errors of 4 biological replicates are represented by dots and error bars. Linear modeling of log-transformed cell counts relative to time was used to measure doubling time ( $T_d$ ), and to estimate the significance of the effect of genotype ( $p$ -value is given in the inset). Shaded areas represent the 95% confidence interval for theoretical future measurements. (D, E) Cell number after 3 days of culture in presence of varying doses of (D) doxorubicin or (E) 5-fluoro-uracil (4 clones of each genotype were analyzed; 3 biological replicates for each drug concentration; mean  $\pm$  st. error is shown). Cell number was normalized to cell number count in untreated replicates. Normalized cell number was fitted to an asymptotic model for each clone (fitted models are represented by curves). In order to assess the significance of the effect of genotype, a naïve (non-informed by clone genotype) and a genotype-informed model were compared by an analysis of variance ( $p$ -value is indicated in the inset).

118 change in target expression [Mullokanov et al., 2012]. Hence we anticipate that in all the cell lines  
 119 for which we analyzed miRNA abundance, and in most cells in the analyzed tissues, miR-34 family  
 120 miRNAs are actually non-functional.



121 Yet we do not question the overall functionality of miR-34 miRNAs *in vivo*. Because that family  
122 is deeply conserved in evolution (shared between, *e.g.*, vertebrates and insects), it certainly plays im-  
123 portant biological functions, perhaps only in a small number of cells, or at very specific developmental  
124 stages, where its abundance would be high enough. In mouse, the miR-34 family is particularly ex-  
125 pressed in lungs and testes [Concepcion et al., 2012, Song et al., 2014]. Mutation of all 6 members  
126 of the miR-34 family causes severe ciliogenesis defects, leading to respiratory distress and impaired  
127 gametogenesis – translating into sterility and premature mortality [Song et al., 2014]. Unsurprisingly  
128 then, the most obvious biological functions of that miRNA family seem to take place in the tissues  
129 where miR-34 miRNAs are highly expressed, in contrast with the widely-accepted notion of their  
130 broad anti-tumorigenic activity.

131 While the original definition for tumor suppressors had been formulated with coding genes in  
132 mind, we consider that there is no objective reason for adopting a different definition for tumor  
133 suppressor miRNAs. In this view, the most heavily studied candidate tumor suppressor miRNA,  
134 miR-34a, does not appear to be a tumor suppressor. It remains formally possible that miR-34a  
135 inactivation is frequent in specific cancer types, distinct from those we could analyze in Fig 1 and  
136 Supplementary Figure S2. In that case, miR-34a may be a tumor suppressor in these particular  
137 cancers – but this possibility is merely speculative, and no such cancer type has been identified so  
138 far.

139 We confirmed that a large artificial over-expression (10 nM) of miR-34a indeed represses cell  
140 proliferation. It could be argued that this cytotoxic effect could provide the ground for an efficient  
141 anti-cancer treatment, no matter how un-natural it is. But the whole purpose of using natural tumor  
142 suppressors (*e.g.*, miRNAs) is that they are expected to be well tolerated, because they already  
143 exist endogenously. Administering large amounts of cytotoxic agents to patients may indeed kill  
144 cancer cells – but it will also likely trigger unwanted adverse effects. In this view, synthetic miR-  
145 34a behaves similarly to existing anti-cancer drugs, which are based on exogenous molecules. It is  
146 therefore not surprising to observe a variety of adverse secondary effects when the MRX34 miR-34a  
147 mimic is administered to patients [Beg et al., 2017, Hong et al., 2020]. More innocuous miRNA-based  
148 treatments may be possible, but they would have to rely on rigorously established tumor-suppressive  
149 activity of the endogenous miRNA.

## 150 Materials and Methods

### 151 Analysis of *miR-34a* expression and integrity in human cancers

152 miRNA expression data was downloaded from the GDC portal on April 29, 2021. Cancer types where  
153 at least 10 cases were available (with Small RNA-Seq data from normal solid tissue and primary tumor  
154 for each case) were selected, and depth-normalized read counts were compared between normal tissue  
155 and tumor for each case. The heatmap shown on Fig 1A shows the median log-ratio between tumor  
156 and normal tissue, with non-significant changes (calculated with the Wilcoxon test, FDR-adjusted  
157 for multiple hypothesis testing) being colored in white.

158 miRNA gene ploidy data was downloaded from the GDC portal on March 4, 2021. Erroneous  
159 miRNA gene coordinates were corrected using information from miRBase. For the heatmap shown on  
160 Fig 1B, the percentage of cases with miRNA gene loss (either homo- or heterozygous) was evaluated  
161 for each miRNA, selecting cancer types where ploidy was determined in at least 100 cases.

162 miRNA sequence variation data was downloaded from the GDC portal on February 24, 2021.  
163 SNP location was intersected with miRNA hairpin and mature miRNA coordinates from miRBase  
164 (as well as with miRNA seed coordinates, defined as nt 2–7 of the mature miRNA). For the heatmaps  
165 shown on Supplementary Figure S2, the percentage of cases with sequence variations in miRNA genes  
166 (hairpin, mature or seed sequences) is displayed, selecting cancer types with at least 100 analyzed  
167 cases.

168 For each of these heatmaps, miRNAs and cancer types were clustered with the heatmap.2 com-  
169 mand with the **R** software.

## 170 CRISPR/Cas9-mediated mutagenesis

171 Four sgRNAs were designed using CRISPOR (<http://crispor.tefor.net/> [Concordet and Haeussler, 2018])  
172 to target each side of the human pre-mir-34a sequence, and cloned into an expression plasmid for  
173 *S. pyogenes* Cas9 (pSpCas9(BB)-2A-GFP plasmid (PX458), a gift from Feng Zhang [Ran et al., 2013];  
174 Addgene plasmid #48138; <http://n2t.net/addgene:48138>; RRID:Addgene\_48138). Targeting ef-  
175 ficiency of each plasmid was estimated by Sanger sequencing of the targeted locus in transfected  
176 HCT-116 cells, and analyzed with the Synthego ICE Analysis online tool (<https://ice.synthego.com/#/>).  
177 Mutagenesis was performed using the most efficient sgRNA sequence on each side of the tar-  
178 geted locus (AAGCTCTTCTGCGCCACGGT**GGG** and GCCGGTCCACGGCATCCGGAG**GG**;  
179 PAM sequences in bold; also see Supplementary Figure S4).

180 HCT-116 (ATCC® cat. #CCL247) and HAP1 (Horizon Discovery cat. #C631) cells were grown  
181 till 80% confluency and transfected with the two plasmids (15 µg each) following the protocol for  
182 Lipofectamine 2000 Transfection Reagent (Thermo Fisher Scientific). After 24 hours, Cas9-GFP-  
183 expressing single cells were isolated in 96-well plates by flow cytometry on a BD FACSMelody  
184 (Becton Dickinson), then grown for 10 days. Homozygous wild-type and mutant clones were first  
185 tested by discriminative PCRs (with primer pairs ACTTCTAGGGCAGTATACTTGCT and GCT-  
186 GTGAGTGTCTTCTTTGGC; and TCCTCCCCACATTTCTTCT and GCAAACCTTCTCCCAGC-  
187 CAAA), and eventually validated by Sanger sequencing of their *miR-34a* locus. For the HAP1 cell  
188 line, mutagenesis efficiency was so high that we were unable to isolate wild-type clones after cotrans-  
189 fection of sgRNA-carrying PX458 plasmids. Wild-type clones were therefore generated by transfection  
190 of HAP1 cells with a plasmid expressing SpCas9-HF1 variant but no sgRNA (the VP12 plasmid, a gift  
191 from Keith Joung [Kleinstiver et al., 2016]; Addgene plasmid #72247 ; [http://n2t.net/addgene:](http://n2t.net/addgene:72247)  
192 [72247](http://n2t.net/addgene:72247); RRID:Addgene\_72247), and went through the same isolation and selection process as mutant  
193 clones.

## 194 RNA extraction

195 Cells plated in 10 cm Petri dishes were lysed and scrapped in 6 mL ice-cold TRIzol™ Reagent  
196 (Invitrogen) added directly to the culture dish after removal of the growth medium, and mixed with  
197 1.2 mL of water-saturated chloroform. Samples were homogenized by vigorous shaking for 1 min and  
198 centrifuged for 5 min at 12,000 g and 4°C to allow phase separation. The aqueous phase was transferred  
199 in a new tube and mixed with 3 mL isopropanol for precipitation. After a 10 min incubation at room  
200 temperature, samples were centrifuged for 10 min at 12,000 g and 4°C and the supernatant was  
201 removed. The RNA pellet was washed with 6 mL of 70% ethanol and samples were centrifuged for  
202 5 min at 12,000 g and 4°C. After complete removal of ethanol, the RNA pellet was resuspended in  
203 20 µL RNase-free water and the quantity of total RNA was determined by spectrophotometry on a  
204 NanoDrop ND-1000.

## 205 Small RNA-Seq

206 Total RNA of each cell line was extracted 48 h after seeding and quality was assessed on elec-  
207 trophoretic spectra from a Fragment Analyzer (Agilent), analyzed with the PROSize software (v. 3.0.1.6).  
208 Libraries were prepared using NEXTflex™ Small RNA-Seq Kit v3 (Bioo Scientific) following the man-  
209 ufacturer's instructions. Libraries were verified by DNA quantification using Fragment Analyzer (kit  
210 High Sensitivity NGS), and by qPCR (ROCHE Light Cycler 480). Libraries were sequenced on  
211 Illumina NovaSeq 6000 using NovaSeq Reagent Kit (100 cycles). RNA quality assessment, library  
212 preparation, validation and sequencing were performed by the MGX sequencing facility.

213 Adapters ended with 4 randomized nucleotides in order to reduce ligation biases. Because of the  
214 sequencing design, the adapter sequence (5' GTTCAGAGTTCTACAGTCCGACGATCNNNN 3')  
215 appears at the beginning of the read sequence, and the final 4 nucleotides of the read are the initial  
216 randomized nucleotides of the other adapter, whose other nucleotides are not read. Hence small RNA  
217 reads can be extracted from the fastq files with the following command:

```
218 cutadapt -g GTTCAGAGTTCTACAGTCCGACGATCNNNN --discard-untrimmed -m 18 -M 30 \  
219 $input_file.fastq | cutadapt -u -4 -
```

## 220 Cell transfection

221 Cells were transfected 24 hours after seeding either with a control duplex, siRNA against eGFP:  
222 5'-GGCAAGCUGACCCUGAAGUdTdT-3' / 5'-ACUUCAGGGUCAGCUUGCCdTdT-3'  
223 or with a hsa-miR-34a mimic duplex:  
224 5'-P-UGGCAGUGUCUUAGCUGGUUGUU-3' / 5'-P-CAAUCAGCAAGUAUACUGCCCUA-3'  
225 according to the protocol for Lipofectamine 2000 Transfection Reagent (Thermo Fisher Scientific).

## 226 Proliferation assays

227 Because the mere procedure of isolating and selecting mutated clones may artifactually select clones  
228 with exceptionally high proliferation rates, we applied the same isolation and selection procedure to  
229 wild-type clones, and we measured proliferation rates on several independent wild-type and mutant  
230 clones. Each cell line was seeded in 96-well plates (Fig 2C: in 4 replicates at  $3 \times 10^3$  cells/well per  
231 time point; Figs 3A and B: in 6 replicates at  $6 \times 10^3$  cells/well). From 24 hours after cell seeding or  
232 transfection, to 3 days later, the number of living cells was determined twice a day by CellTiter-Glo  
233 Luminescent Cell Viability Assay (Promega) according to the manufacturer's protocol and recorded  
234 with a TriStar LB 941 (Berthold Technologies). Linear regression of log-transformed cell counts  
235 relative to time and genotype (in R syntax: `log-transformed cell counts ~ time * genotype`)  
236 or transfected duplex identity (`log-transformed cell counts ~ time * duplex identity`) was  
237 used to measure doubling time and to estimate the significance of the effect of genotype or transfected  
238 duplex.

239 For Fig 2D and E, doxorubicin (Sigma-Aldrich) was diluted in molecular biology-grade water and  
240 5-fluorouracil (5-FU) (Sigma-Aldrich) diluted in dimethyl sulfoxide (SigmaAldrich). In a preliminary  
241 experiment, half-maximal inhibitory concentration (IC50) was estimated after 72 h drug exposure:  
242  $7 \times 10^{-8}$  M and  $8 \times 10^{-6}$  M for doxorubicin and 5-FU respectively. Cell lines were seeded in 3  
243 replicates per drug concentration at  $2.5 \times 10^3$  cells/well in 96-well plates. After 24 hours, culture  
244 medium was replaced with drug-containing medium (concentration range centered on the IC50 with  
245  $2.5 \times$  increments), or solvent-containing medium for untreated controls, and the number of living cells  
246 was determined 72 h later by CellTiterGlo Luminescent Cell Viability Assay (Promega). Cell counts  
247 were normalized to the mean cell number in untreated controls. Normalized cell number was fitted  
248 to an asymptotic model for each clone to assess the significance of the effect of genotype (using an  
249 analysis of variance to compare a model not informed by clone genotype, to a genotype-informed  
250 model).

## 251 miRNA quantification by RT-ddPCR

252 Reverse transcription of a specific miRNA in HCT-116 cells was performed on 10 ng total RNA using  
253 the TaqMan microRNA Reverse Transcription Kit (Thermo Fisher Scientific) in a total volume of  
254 15  $\mu$ L, according to the manufacturer's protocol, with miRNA-specific RT primers from the TaqMan  
255 MicroRNA Assay Kit (assay IDs for hsa-miR-34a-5p and miR-21b-5p are respectively 000426 and  
256 000397). ddPCR amplification of the cDNA was performed on 1.33  $\mu$ L of each cDNA combined  
257 with 1  $\mu$ L of miRNA-specific 20X TaqMan MicroRNA Reagent containing probes and primers for  
258 amplification from the TaqMan MicroRNA Assay Kit (Thermo Fisher Scientific), 10  $\mu$ L of 2X ddPCR  
259 Supermix for probes (no dUTP) (Bio-Rad), and 7.67  $\mu$ L of molecular biology-grade water. Droplets  
260 were generated, thermal cycled and detected by the QX200 Droplet Digital PCR System (Bio-Rad)  
261 according to the ddPCR Supermix protocol and manufacturer's instructions. Data were extracted  
262 using QuantaSoft Pro Software (Bio-Rad).



## 263 Data and script availability

264 Deep-sequencing data has been deposited at SRA and linked to BioProject number PRJNA695193.  
265 Scripts, raw, intermediate and final data files are available at [https://github.com/HKeyHKey/](https://github.com/HKeyHKey/Mockly_et_al_2021)  
266 [Mockly\\_et\\_al\\_2021](https://github.com/HKeyHKey/Mockly_et_al_2021) and at [https://www.igh.cnrs.fr/en/research/departments/genetics-development/](https://www.igh.cnrs.fr/en/research/departments/genetics-development/systemic-impact-of-small-regulatory-rnas#programmes-informatiques/)  
267 [systemic-impact-of-small-regulatory-rnas#programmes-informatiques/](https://www.igh.cnrs.fr/en/research/departments/genetics-development/systemic-impact-of-small-regulatory-rnas#programmes-informatiques/).

## 268 Acknowledgments

269 We thank G. Canal, C. Theillet, P.D. Zamore and members of the Seitz lab for critical reading of the  
270 manuscript, and A. Péliesson and K. Mochizuki for useful discussions. This research was supported by  
271 Cancéropôle GSO “Émergence” grant and Projet Fondation ARC #PJA 20191209613. We thank the  
272 MGX facility (Biocampus Montpellier, CNRS, INSERM, Univ. Montpellier, Montpellier, France) for  
273 sequencing the Small RNA-Seq libraries.

## 274 Author contributions

275 S.M. and É.H. performed experiments; S.M. and H.S. performed computational analyses; S.M. and  
276 H.S. wrote the manuscript and prepared figures.

## 277 Conflict of interest

278 The authors do not declare any conflict of interest.

## 279 References

- 280 [Adams et al., 2016] Adams, B. D., Parsons, C. and Slack, F. J. (2016). *Expert Opin Ther Targets*  
281 20, 737–753.
- 282 [Bader, 2012] Bader, A. G. (2012). *Front Genet* 3, 120.
- 283 [Bagchi et al., 2007] Bagchi, A., Papazoglu, C., Wu, Y., Capurso, D., Brodt, M., Francis, D., Bredel,  
284 M., Vogel, H. and Mills, A. A. (2007). *Cell* 128, 459–475.
- 285 [Bartel, 2009] Bartel, D. P. (2009). *Cell* 136, 215–233.
- 286 [Beg et al., 2017] Beg, M. S., Brenner, A. J., Sachdev, J., Borad, M., Kang, Y.-K., Stoudemire, J.,  
287 Smith, S., Bader, A. G., Kim, S. and Hong, D. S. (2017). *Invest New Drugs* 35, 180–188.
- 288 [Bommer et al., 2007] Bommer, G. T., Gerin, I., Feng, Y., Kaczorowski, A. J., Kuick, R., Love,  
289 R. E., Zhai, Y., Giordano, T. J., Qin, Z. S., Moore, B. B., MacDougald, O. A., Cho, K. R. and  
290 Fearon, E. R. (2007). *Curr Biol* 17, 1298–1307.
- 291 [Chang et al., 2007] Chang, T.-C., Wentzel, E. A., Kent, O. A., Ramachandran, K., Mullendore, M.,  
292 Lee, K. H., Feldmann, G., Yamakuchi, M., Ferlito, M., Lowenstein, C. J., Arking, D. E., Beer,  
293 M. A., Maitra, A. and Mendell, J. T. (2007). *Mol Cell* 26, 745–752.
- 294 [Concepcion et al., 2012] Concepcion, C. P., Han, Y.-C., Mu, P., Bonetti, C., Yao, E., D’Andrea, A.,  
295 Vidigal, J. A., Maughan, W. P., Ogradowski, P. and Ventura, A. (2012). *PLoS Genet* 8, e1002797.
- 296 [Concordet and Haeussler, 2018] Concordet, J.-P. and Haeussler, M. (2018). *Nucleic Acids Res* 46,  
297 W242–W245.
- 298 [Corney et al., 2007] Corney, D. C., Flesken-Nikitin, A., Godwin, A. K., Wang, W. and Nikitin,  
299 A. Y. (2007). *Cancer Res* 67, 8433–8438.

- 300 [Corney et al., 2010] Corney, D. C., Hwang, C.-I., Matoso, A., Vogt, M., Flesken-Nikitin, A., Godwin, A. K., Kamat, A. A., Sood, A. K., Ellenson, L. H., Hermeking, H. and Nikitin, A. Y. (2010).  
301 Clin Cancer Res 16, 1119–1128.  
302
- 303 [Friedman et al., 2009] Friedman, R. C., Farh, K. K., Burge, C. B. and Bartel, D. P. (2009). Genome  
304 Res 19, 92–105.
- 305 [Gallardo et al., 2009] Gallardo, E., Navarro, A., Viñolas, N., Marrades, R. M., Diaz, T., Gel, B.,  
306 Quera, A., Bandres, E., Garcia-Foncillas, J., Ramirez, J. and Monzo, M. (2009). Carcinogenesis  
307 30, 1903–1909.
- 308 [Green, 1988] Green, A. R. (1988). Br J Cancer 58, 115–121.
- 309 [He et al., 2007] He, L., He, X., Lim, L. P., de Stanchina, E., Xuan, Z., Liang, Y., Xue, W., Zender,  
310 L., Magnus, J., Ridzon, D., Jackson, A. L., Linsley, P. S., Chen, C., Lowe, S. W., Cleary, M. A.  
311 and Hannon, G. J. (2007). Nature 447, 1130–1134.
- 312 [Hong et al., 2020] Hong, D. S., Kang, Y.-K., Borad, M., Sachdev, J., Ejadi, S., Lim, H. Y., Brenner,  
313 A. J., Park, K., Lee, J.-L., Kim, T.-Y., Shin, S., Becerra, C. R., Falchook, G., Stoudemire, J.,  
314 Martin, D., Kelnar, K., Peltier, H., Bonato, V., Bader, A. G., Smith, S., Kim, S., O’Neill, V. and  
315 Beg, M. S. (2020). Br J Cancer 122, 1630–1637.
- 316 [Iwakawa and Tomari, 2015] Iwakawa, H. O. and Tomari, Y. (2015). Trends Cell Biol 25, 651–665.
- 317 [Kleinstiver et al., 2016] Kleinstiver, B. P., Pattanayak, V., Prew, M. S., Tsai, S. Q., Nguyen, N. T.,  
318 Zheng, Z. and Joung, J. K. (2016). Nature 529, 490–495.
- 319 [Lodygin et al., 2008] Lodygin, D., Tarasov, V., Epanchintsev, A., Berking, C., Knyazeva, T.,  
320 Körner, H., Knyazev, P., Diebold, J. and Hermeking, H. (2008). Cell Cycle 7, 2591–2600.
- 321 [Mockly and Seitz, 2019] Mockly, S. and Seitz, H. (2019). Methods Mol Biol 1970, 291–314.
- 322 [Mullokandov et al., 2012] Mullokandov, G., Baccarini, A., Ruzo, A., Jayaprakash, A. D., Tung, N.,  
323 Israelow, B., Evans, M. J., Sachidanandam, R. and Brown, B. D. (2012). Nat Methods 9, 840–846.
- 324 [Navarro and Lieberman, 2015] Navarro, F. and Lieberman, J. (2015). PLoS One 10, e0132767.
- 325 [Ran et al., 2013] Ran, F. A., Hsu, P. D., Wright, J., Agarwala, V., Scott, D. A. and Zhang, F.  
326 (2013). Nat Protoc 8, 2281–2308.
- 327 [Raver-Shapira et al., 2007] Raver-Shapira, N., Marciano, E., Meiri, E., Spector, Y., Rosenfeld, N.,  
328 Moskovits, N., Bentwich, Z. and Oren, M. (2007). Mol Cell 26, 731–743.
- 329 [Slack and Chinnaiyan, 2019] Slack, F. J. and Chinnaiyan, A. M. (2019). Cell 179, 1033–1055.
- 330 [Song et al., 2014] Song, R., Walentek, P., Sponer, N., Klimke, A., Lee, J. S., Dixon, G., Harland,  
331 R., Wan, Y., Lishko, P., Lize, M., Kessel, M. and He, L. (2014). Nature 510, 115–120.
- 332 [Tarasov et al., 2007] Tarasov, V., Jung, P., Verdoodt, B., Lodygin, D., Epanchintsev, A., Menssen,  
333 A., Meister, G. and Hermeking, H. (2007). Cell Cycle 6, 1586–1593.
- 334 [Tazawa et al., 2007] Tazawa, H., Tsuchiya, N., Izumiya, M. and Nakagama, H. (2007). Proc Natl  
335 Acad Sci USA 104, 15472–15477.
- 336 [Weinberg, 1991] Weinberg, R. A. (1991). Science 254, 1138–1146.
- 337 [Welch et al., 2007] Welch, C., Chen, Y. and Stallings, R. L. (2007). Oncogene 26, 5017–5022.
- 338 [Wiggins et al., 2010] Wiggins, J. F., Ruffino, L., Kelnar, K., Omotola, M., Patrawala, L., Brown,  
339 D. and Bader, A. G. (2010). Cancer Res 70, 5923–5930.

- 340 [Wong et al., 2011] Wong, K. Y., Yu, L. and Chim, C. S. (2011). *Epigenomics* 3, 83–92.
- 341 [Zhang et al., 2007] Zhang, B., Pan, X., Cobb, G. P. and Anderson, T. A. (2007). *Dev Biol* 302,  
342 1–12.
- 343 [Zhang et al., 2021] Zhang, Z., Hernandez, K., Savage, J., Li, S., Miller, D., Agrawal, S., Ortuno, F.,  
344 Staudt, L. M., Heath, A. and Grossman, R. L. (2021). *Nat Commun* 12, 1226.

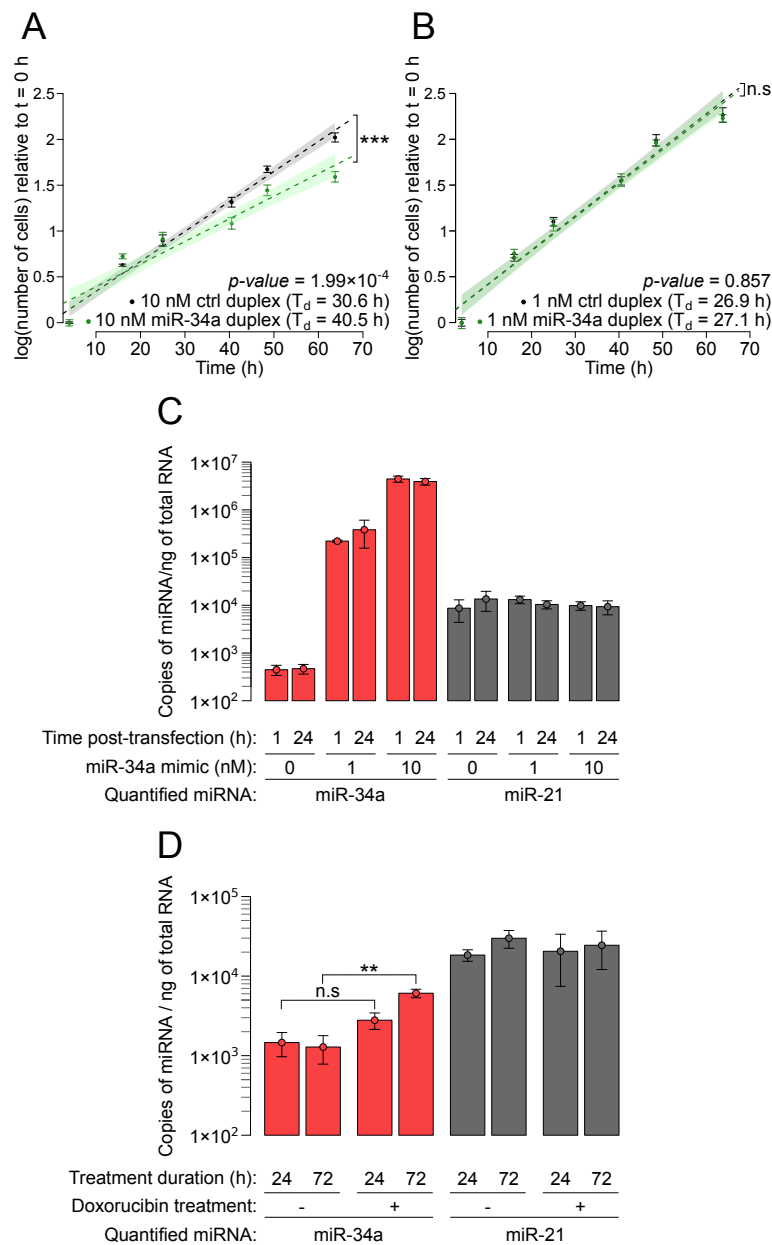

Figure 3: Supra-physiological transfection of miR-34a inhibits cell proliferation. Wild-type HCT-116 cells were transfected with 10 nM (panel A) or 1 nM (panel B) duplex (either a control siRNA duplex, or miR-34a/miR-34a\* duplex) and grown in sub-confluent conditions. Means and standard errors of 6 biological replicates are represented by dots and error bars. Linear modeling of log-transformed cell counts relative to time was used to measure doubling time ( $T_d$ ), and to estimate the significance of the effect of duplex identity ( $p$ -values are given in the inset; asterisks denote  $p$ -value  $< 0.05$ , “n.s.” indicates larger  $p$ -values). Shaded areas represent the 95% confidence interval for theoretical future measurements. (C) Cellular abundance of miR-34a (red bars) or a control miRNA (miR-21; gray bars) 1 or 24 h after transfection of HCT-116 cells with 0, 1 or 10 nM miR-34a/miR-34a\* duplex. (D) HCT-116 cells were treated for 24 or 72 h with  $7 \times 10^{-8}$  M doxorubicin, and their intracellular miR-34a and miR-21 were quantified by RT-ddPCR. Two-way ANOVA analysis shows that doxorubicin treatment has an effect on miR-34a levels ( $p=0.0013$ ), and post-hoc pairwise t-tests find the effect significant only after 72 h exposure to the drug ( $p=0.0521$  for 24 h exposure,  $p=0.00138$  for 72 h exposure, indicated by “n.s.” and “\*\*\*” respectively). A similar two-way ANOVA analysis does not detect a significant effect of doxorubicin treatment on miR-21 levels ( $p=0.768$ ). (Panels C and D) Means and standard errors of 3 biological replicates are represented by dots and error bars, respectively.
